# Supplementary material
Source: publisher figshare collection journal article supplement (https://gsapubs.figshare.com/ndownloader/files/23318351)
Supplement: Supplementary file 1 [file 23318351]

## Sheet: Table DR1 Mantle xenoliths
Table DR1: Major and trace elements, gold and PGEs contents and published Os-Sr-Nd-Hf isotopes in mantle xenoliths from the NCC.
Location	Samples	Age of host basalt/kimberlites	Lithology	Modal compositions (vol.%)				References	Method	SiO2	TiO2	Al2O3	Fe2O3T	MnO	MgO	CaO	Na2O	K2O	P2O5	LOI	Total	WR Mg#		Li	Be	Sc	Ti	V	Cr	Mn	Co	Ni	Cu	Zn	Ga	Rb	Sr	Y	Zr	Nb	Ba	La	Ce	Pr	Nd	Sm	Eu	Gd	Tb
		Ma		olivine	orthopyroxene	clinopyroxene	spinel			wt.%	wt.%	wt.%	wt.%	wt.%	wt.%	wt.%	wt.%	wt.%	wt.%	wt.%	wt.%			ppm	ppm	ppm	ppm	ppm	ppm	ppm	ppm	ppm	ppm	ppm	ppm	ppm	ppm	ppm	ppm	ppm	ppm	ppm	ppm	ppm	ppm	ppm	ppm	ppm	ppm
Mengyin	MY10	480	Dunite					Chu et al. 2009		36.3	0.04	0.06	7.75	0.07	44.6	0.21	0	0.02	0.03	10.5	99.6	91.9353										2729	6.52	38.1			23.9	0.264	5.78	5.89	66.1	3.77	6.42	0.629	2.05	0.262	0.076	0.206	0.018
	MY33	480	Harzburgite					Chu et al. 2009		39.7	0.49	0.27	6.05	0.05	38.7	0.44	0	0.02	0.03	14	99.7	92.6854										2587	3.87	23.3			32.8	3.88	25.9	17.7	3.38	26.4	31.6	2.41	7.31	1	0.187	1.14	0.125
	MY33R
	MY34	480	Harzburgite					Chu et al. 2009		40.8	0.05	0.79	3.96	0.05	39.3	0.46	0	0.03	0.02	14	99.5	95.1595										3227	2.52	33.6			50.3	2.98	19.4	14.2	14.2	24.7	29.2	2.29	7.27	0.915	0.233	0.971	0.095
	MY35	480	Pyroxenite					Chu et al. 2009		37.1	0.32	8.67	8.08	0.13	28.9	2.72	0	0.21	0.2	13.4	99.7	87.6316										427	3.42	52.7			225	3.93	72.9	60.7	308	90.7	120	10	30.4	3.64	0.779	3.13	0.263
Hebi	HB-09	4	Dunite	96.4761	3.44558	0	0.0783085	Liu et al 2011		43.1	0.02	1.95	7.57	0.1	45.4	0.39	<0.01			0.17	99	92.2361			0.4	8.19		20.1	2827		111	2104	39.6	71.5	3.22	2.69	48.7	0.35	9.29	4.03	75.2	2.56	6.06	0.64	1.99	0.22	0.067	0.15	0.016
	HB-10	4	Harzburgite	73.3771	26.6167	0.00155199	0.00465598	Liu et al 2011		43.3	0.04	1.16	8.63	0.1	45.3	0.53	<0.01			0.14	99.3	91.2265			0.11	6.74		25.8	2009		119	2162	29.9	65.1	3.49	1.14	25.6	0.34	4.15	2.08	18.2	0.77	1.6	0.21	0.81	0.15	0.036	0.13	0.016
	PHB-08-3	4	Orthopyroxenite					This study	ICPMS		0.0341865	1.98159	7.49126	0.157701	36.1543	1.27906	0.277008	0.431247	0.0509855			90.5305		6.38138	1.23614	4.95849	204.891	25.7328	1886.1	1221.32	83.8873	1570.35	43.9263	50.6429	5.46293	5.42311	75.6744	1.40893	23.4493	14.9038	55.5014	3.12347	5.87695	0.645358	2.44477	0.513883	0.155495	0.44485	0.0564977
	PHB-08-3R
	PHB-30	4	Dunite					This study	ICPMS		0.016973	0.59852	8.28177	0.11129	49.4017	0.265009	0.0576645	0.0759521	0.0226142			92.1974		3.25472	0.1328	5.4854	101.725	13.4969	1693.19	861.886	123.841	2817.37	1.50206	46.4186	1.22765	0.812304	6.7312	0.324193	11.6015	2.35846	15.2624	0.381241	0.690639	0.0844834	0.323122	0.0661715	0.0230377	0.0424913	0.00813768
	PHB-89	4	Olivine orthopyroxenite					This study	ICPMS		0.0549137	1.82248	6.47093	0.10986	42.0023	0.818312	0.153422	0.297112	0.0514697			92.7839		3.54174	0.579006	9.74607	329.116	32.4358	3311.92	850.813	86.7083	1863.53	5.75224	36.0692	2.8174	3.31578	68.2093	0.977533	17.0609	5.43742	23.4387	2.4858	4.58114	0.498646	1.86479	0.373334	0.113354	0.293629	0.0351166
	PHB-89R
Shanwang	SW01	18	Wehrlite					Chu et al. 2009		41.3	0.3	2.29	14.23	0.18	34.8	5.05	0.17	0.09	0.03	1.05	99.5	82.8895										1808	47.1	93.4			111	3.46	16.9	0.983	4.47	1.76	4.04	0.554	2.688	0.774	0.272	0.863	0.131
	SW01SR
	SW02	18	Lherzolite	58.7	21	17.7	2.6	Chu et al. 2009		44.3	0.08	3.29	8.18	0.12	37.7	3.75	0.16	0.06	0.02	1.88	99.4	90.1279										2412	29.8	53.7			75.8	2.82	2.48	0.083	1.44	0.052	0.147	0.039	0.304	0.173	0.074	0.303	0.061
	SW03	18	Lherzolite	51.7	35.2	11	2.1	Chu et al. 2009		44.9	0.06	3.07	8.94	0.1	37.2	2.36	0.13	0.1	0.03	2.48	99.4	89.1806										2686	24	61.2			59.2	2.14	2.3	0.362	2.36	0.22	0.38	0.053	0.299	0.138	0.056	0.24	0.048
	SW03SR
	SW04	18	Pyroxenite	34.9	15.1	50	0.02	Chu et al. 2009		43.2	0.08	3.19	7.6	0.1	26	9.26	0.2	0.2	0.03	9.69	99.5	87.1412										2363	32.4	57.4			2120	2.54	6.04	1.15	14.3	0.262	0.497	0.067	0.364	0.158	0.073	0.27	0.054
	SW05	18	Lherzolite	63.7	23	11.2	2.2	Chu et al. 2009		44.3	0.09	2.7	9.51	0.13	38.8	2.64	0.19	0.09	0.02	0.98	99.5	88.9891										2449	2.7	75.1			72.6	2.8	6.59	1.41	4.8	1.28	3.18	0.421	1.83	0.428	0.152	0.49	0.078
	SW05SR
	SW06	18	Lherzolite	60.8	27.1	10.4	1.8	Chu et al. 2009		44.9	0.11	2.93	8.42	0.11	39.9	2.38	0.18	0.04	0.03	0.4	99.4	90.3725										2343	33.2	60			34.1	2.91	9.95	0.972	2.44	1.29	3.21	0.42	1.87	0.436	0.16	0.526	0.084
	SW07	18	Harzburgite	76.6	17.8	4.8	0.8	Chu et al. 2009		43.7	0.02	1.21	8.13	0.1	44.1	1.09	0.05	0.05	0.03	0.95	99.4	91.4858										2854	12.4	53.7			27.7	0.668	3.39	0.327	2.1	1.03	1.95	0.203	0.731	0.12	0.043	0.133	0.019
	SW08	18	Lherzolite	60.7	22.1	14.4	2.7	Chu et al. 2009		44.3	0.12	3.46	8.88	0.13	38.6	3.02	0.21	0.08	0.05	0.48	99.4	89.5949										2294	12	63.2			53.9	4.27	11.7	1.09	4.09	2.49	5.71	0.724	3.25	0.726	0.247	0.818	0.122
	SW09	18	Lherzolite	72.8	17.7	7.6	1.9	Chu et al. 2009		43.6	0.02	1.79	8.13	0.09	42.9	1.62	0.09	0.05	0.03	1.02	99.4	91.2684										2630	14.1	59.5			42.8	0.882	4.04	0.231	0.985	0.98	2.02	0.219	0.846	0.162	0.057	0.175	0.025
	SW10	18	Lherzolite	62.6	22.3	12.2	2.9	Chu et al. 2009		44.5	0.07	3.08	8.05	0.11	40	2.62	0.12	0.03	0.04	0.78	99.4	90.7774										2391	26.9	56.2			34.2	2.31	2.09	0.078	1.44	0.082	0.168	0.035	0.254	0.134	0.061	0.261	0.051
	SW11	18	Lherzolite	64.9	20.8	12.8	1.5	Chu et al. 2009		44.2	0.06	2.22	7.95	0.09	40.5	2.78	0.12	0.03	0.03	1.42	99.4	90.984										2507	20.6	52.4			159	1.67	4	0.445	1.56	0.595	1.08	0.122	0.55	0.162	0.062	0.233	0.042
	SW12	18	Lherzolite	56.7	25.2	15.2	2.9	Chu et al. 2009		44.8	0.09	3.58	8.54	0.12	38	3.31	0.18	0.03	0.02	0.79	99.4	89.8108										2266	41.2	52.4			18.3	3.24	2.25	0.032	0.225	0.053	0.138	0.038	0.329	0.194	0.084	0.352	0.076
	SW13	18	Lherzolite	65	22.1	10.3	2.6	Chu et al. 2009		44.3	0.07	2.7	7.86	0.1	41.2	2.31	0.13	0.03	0.03	0.65	99.4	91.2152										2311	27.2	55.6			16.4	2.33	3.75	0.318	1.45	0.188	0.466	0.075	0.45	0.194	0.076	0.303	0.058
	SW14	18	Lherzolite	61.5	21.4	14.3	2.8	Chu et al. 2009		43.8	0.1	3.4	8.59	0.12	39.2	2.83	0.14	0.05	0.03	1.05	99.3	90.0396										2094	29.8	60.1			65	2.86	5.17	0.49	1.3	1.59	3.52	0.422	1.78	0.425	0.148	0.503	0.084
	SW15	18	Lherzolite	61.5	23.7	13.3	1.5	Chu et al. 2009		44.6	0.06	2.39	7.69	0.09	40.2	2.84	0.11	0.03	0.06	1.32	99.4	91.1935										2571	24.3	52			79.3	1.9	3.62	0.134	1.08	0.397	0.758	0.094	0.457	0.147	0.058	0.228	0.041
	SW16	18	Lherzolite	66.3	22.7	9.6	1.5	Chu et al. 2009		44.3	0.03	2.05	7.79	0.1	41.9	2.09	0.11	0.05	0.02	0.95	99.4	91.4197										2219	26.2	47.6			122	1.18	2.85	0.664	2.23	1.01	2.12	0.226	0.814	0.159	0.054	0.187	0.033
	SW17	18	Lherzolite	57.8	26.2	13.3	2.7	Chu et al. 2009		44.5	0.09	3.53	8.51	0.12	39	2.74	0.17	0.08	0.04	0.67	99.4	90.0775										1829	8.78	60.3			64.3	3.12	7.33	1.01	4.69	2.11	5.01	0.621	2.67	0.595	0.209	0.663	0.106
	SW21	18	Wehrlite	63.5	3	29.9	3.6	Chu et al. 2009		41.2	0.48	3.75	14.3	0.17	32.7	5.73	0.22	0.07	0.05	0.92	99.5	81.916										1324	63.8	95.2			105	4.22	18.8	1.4	6.97	2.94	6.6	0.859	4.2	1.16	0.409	1.34	0.195
	SW22	18	Lherzolite	61.3	25.7	11	2.1	Chu et al. 2009		45	0.07	2.89	8.67	0.12	39.8	2.38	0.13	0.05	0.02	0.38	99.5	90.0925										1929	2.56	67.9			22.6	2.2	4.31	0.237	0.92	0.786	1.88	0.239	1.09	0.287	0.106	0.371	0.067
R: Replicate digestion of the same sample powder to evaluate sample heterogeneity.
SR: Re-analyses of different aqua regia solution from the same sample digestion for data quality evaluation of gold and PGEs.
Most mantle xenoliths have been well studied, inlcuding PGEs (Chu et al., 2009; Liu et al., 2011) and only three samples from Hebi were newly measured in this study.
The major and trace elements of the newly collected three Hebi xenoliths were measured by ICP-MS.
Au (a) was determined by internal standardlization of Au to Pt; Au (b) by standard addition methods. The results are consistent within 5-10%.
Note that the contents of Pd, Au and Cu are low, even if many refractory samples show high S contents. The pyroxenites also show low Au contents.
Literature
Liu, J., Rudnick, R.L., Walker, R.J., Gao, S., Wu, F.-y., Piccoli, P.M., Yuan, H., Xu, W.-l., Xu, Y.-G., 2011. Mapping lithospheric boundaries using Os isotopes of mantle xenoliths: An example from the North China Craton. Geochim. Cosmochim. Acta 75, 3881-3902.
Chu, Z.Y., Wu, F.Y., Walker, R.J., Rudnick, R.L., Pitcher, L., Puchtel, I.S., Yang, Y.H., Wilde, S.A., 2009. Temporal Evolution of the Lithospheric Mantle beneath the Eastern North China Craton. J. Petrol. 50, 1857-1898.
Li, Q.-L., Wu, F.-Y., Li, X.-H., Qiu, Z.-L., Liu, Y., Yang, Y.-H. and Tang, G.-Q. (2011) Precisely dating Paleozoic kimberlites in the North China Craton and Hf isotopic constraints on the evolution of the subcontinental lithospheric mantle. Lithos 126, 127-134.
Gao, S., Rudnick, R.L., Xu, W.-L., Yuan, H.-L., Liu, Y.-S., Walker, R.J., Puchtel, I.S., Liu, X., Huang, H., Wang, X.-R. and Yang, J. (2008) Recycling deep cratonic lithosphere and generation of intraplate magmatism in the North China Craton. Earth Planet. Sci. Lett. 270, 41-53.
# In-situ Sr in Cpx on Hebi mantle xenoliths. Sun, J., Liu, C.-Z., Wu, F.-Y., Yang, Y.-H., Chu, Z.-Y., 2012. Metasomatic origin of clinopyroxene in Archean mantle xenoliths from Hebi, North China Craton: Trace-element and Sr-isotope constraints. Chem. Geol. 328, 123-136.
*Whole rock Sr-Nd isotopes on Mengyin peridotite xenoliths. Zhang, H.-F., Goldstein, S.L., Zhou, X.-H., Sun, M., Zheng, J.-P., Cai, Y., 2008. Evolution of subcontinental lithospheric mantle beneath eastern China: Re–Os isotopic evidence from mantle xenoliths in Paleozoic kimberlites and Mesozoic basalts. Contrib. Mineral. Petrol. 155, 271-293.
*Wu, F.-Y., Walker, R.J., Yang, Y.-H., Yuan, H.-L. and Yang, J.-H. (2006) The chemical-temporal evolution of lithospheric mantle underlying the North China Craton. Geochim. Cosmochim. Acta 70, 5013-5034.
[truncated: 110 more columns]

## Sheet: Table DR2 Basalts
Table DR2: Major and trace elements, gold and PGEs contents and published Os-Sr-Nd-Hf-Pb isotopes in the basalts.
Locations	Samples	Age	Minimum Age	Data sources	SiO2	TiO2	Al2O3	TFe2O3	MnO	MgO	CaO	Na2O	K2O	P2O5	LOI	Total	Mg#		Li	Be	Sc	Ti	V	Cr	Mn	Co	Ni	Cu	Zn	Ga	Rb	Sr	Y	Zr	Nb	Mo	Sn	Cs	Ba	La	Ce	Pr	Nd	Sm	Eu	Gd	Tb	Dy	Ho
		Ma	Ma		wt.%	wt.%	wt.%	wt.%	wt.%	wt.%	wt.%	wt.%	wt.%	wt.%					ppm	ppm	ppm	ppm	ppm	ppm	ppm	ppm	ppm	ppm	ppm	ppm	ppm	ppm	ppm	ppm	ppm	ppm	ppm	ppm	ppm	ppm	ppm	ppm	ppm	ppm	ppm	ppm	ppm	ppm	ppm
Hebi
	HB-28	4.3-4.0	4	This study	40.43	2.61	12.75	11.94	0.17	10.26	11.15	4.15	1.7	1.05	3.63	99.84	62.9928		9.30739	3.75451	14.8956	15480.6	203.303	218.481	1334.3	48.7244	210.607	40.0632	107.32	21.7441	17.4134	1129.95	24.5964	324.061	125.389	2.41648	2.34003	0.44698	299.337	56.1492	111.198	12.2433	47.5521	9.42395	3.05234	7.7949	1.06205	5.28599	0.862723
	HB-30	4.3-4.0	4	This study	40.22	2.69	12.31	12.02	0.16	10.91	9.83	3.49	2.36	1.07	4.97	100.03	64.2598		8.69842	3.78794	15.0197	16210.7	199.135	218.804	1314.98	50.2383	219.274	39.7987	111.805	20.7302	25.5385	1143.29	24.3934	330.329	126.397	3.26516	2.39231	0.49799	366.903	59.08	116.077	12.8932	50.1129	9.98307	3.08527	8.0901	1.10306	5.52505	0.90907
	HB-58	4.3-4.0	4	This study	40.56	2.7	12.95	12.37	0.16	11.07	9.01	4.61	2.02	1.16	3.5	100.11	63.9343		7.40236	3.91234	14.7922	15610.2	193.008	204.541	1322.51	50.6158	246.754	39.4463	109.695	24.6294	34.541	1119.14	25.0174	337.946	130.274	1.75962	2.39179	0.469653	413.673	59.7654	116.87	12.9777	50.286	9.93842	3.11832	8.18239	1.11217	5.51821	0.890601
	HB-69	4.3-4.0	4	This study	40.95	2.58	12.5	11.86	0.17	10.45	9.8	3.73	2.16	1.07	4.24	99.51	63.5754		7.28275	3.85229	14.7975	15444.3	193.73	220.57	1321.11	48.8053	225.159	45.7592	109.334	23.873	35.1964	1177.88	25.0912	348.753	135.871	1.89833	2.35074	0.458255	516.519	58.7293	114.18	12.704	49.137	9.948	3.00164	8.04394	1.09508	5.48306	0.887173
	HB-85	4.3-4.0	4	This study	40.64	2.58	12.96	11.73	0.16	10.18	11.09	4.12	1.85	1.05	3.38	99.74	63.2237		8.96449	3.52194	13.8414	15433.8	188.418	203.136	1296.63	48.7342	233.267	34.7682	110.307	22.8124	21.6923	1112.1	24.9101	347.623	132.204	3.90232	2.34971	0.322859	368.909	57.0096	113.054	12.5471	48.1586	9.67366	2.94518	7.70396	1.06753	5.28546	0.858578
	HB-85R	4.3-4.0	4	This study	40.69	2.58	13	11.76	0.16	10.21	11.11	4.1	1.85	1.07	3.4	99.93	63.2327		8.98133	3.46272	13.623	15246.3	184.321	206.658	1273.5	47.9141	229.314	35.1852	111.735	22.7447	21.7878	1110.41	24.5682	337.669	132.153	3.75773	2.46764	0.316861	373.054	57.2527	113.172	12.4561	48.8494	9.41354	2.9432	7.83054	1.0707	5.3797	0.841492
	HB-91	4.3-4.0	4	This study	40.26	2.58	12.75	11.82	0.16	10.13	11.51	4.25	2.14	1.11	2.92	99.63	62.931		9.52586	3.43338	14.1887	15576.9	190.98	197.157	1291.78	48.6262	216.098	36.0036	109.327	22.8044	17.8013	1229.16	24.359	343.506	129.291	2.55328	2.27914	0.404068	330.547	57.5332	115.102	12.6891	48.6755	9.58611	3.02884	7.80851	1.09218	5.41633	0.875563
Jianguo
	JG-3	100.4	100.4	This study	44.11	2.89	14.8	11.85	0.17	8.74	10.06	2.94	2.01	0.6	1.36	99.53	59.3664		6.64528	1.92219	25.167	17333.4	270.002	233.932	1332.78	45.0324	164.634	52.4355	88.7628	20.6131	49.3808	788.303	28.4004	216.287	65.4374	2.0746	1.86836	0.393803	759.609	40.949	83.1834	9.62636	38.123	7.98476	2.47114	6.97205	1.02078	5.61011	1.02661
	JG-3R																		6.76105	1.96322	25.3818	17413.2	270.18	235.532	1355.17	44.9892	168.835	53.6222	90.3484	20.7435	49.4167	799.03	28.5571	222.066	65.3377	2.14477	1.82738	0.404289	762.07	41.2586	84.1966	9.48729	38.7477	7.93488	2.52305	6.93127	0.976689	5.72167	1.03645
	JG-3R
	JG-37	100.4	100.4	This study	43.98	2.92	14.8	11.97	0.17	8.76	9.79	3.04	1.97	0.62	1.48	99.5	59.1783		7.00452	1.94289	25.4263	17943.8	274.76	234.183	1386.67	46.2232	169.651	53.5864	90.3598	20.7749	48.2221	857.005	29.3281	222.457	67.0285	2.99474	1.83706	0.567335	758.238	41.601	84.1342	9.63354	38.3214	8.08294	2.48566	7.05883	1.01222	5.80201	1.05134
	JG-37SR
	JG-4	100.4	100.4	This study	43.85	2.88	14.82	11.98	0.17	8.79	9.91	3.21	2.08	0.62	1.23	99.54	59.2407		6.68402	1.92228	25.1021	17627	276.417	238.238	1366.71	45.6383	170.237	53.508	89.9509	21.1559	51.7633	777.402	28.8739	223.714	66.3647	2.00606	1.83841	0.405782	720.551	41.7245	84.1298	9.62348	39.2104	8.01236	2.53404	7.02372	1.01196	5.58982	1.04052
	JG-4SR
	JG-5	100.4	100.4	This study	44.15	2.92	14.96	12.02	0.18	8.51	9.85	3.31	2.05	0.62	1.15	99.72	58.3758		6.76854	1.97511	25.5331	18010.2	276.991	222.33	1367.45	44.7839	165.004	55.6992	89.7195	20.8369	49.1367	822.451	30.4908	224.589	65.7295	2.38377	1.86086	0.428855	761.179	41.1358	82.6074	9.59552	38.4155	7.89316	2.54689	7.00884	1.03265	5.66177	1.04765
	JG-5SR	100.4	100.4
	JG-6	100.4	100.4	This study	44.13	2.92	14.84	11.91	0.17	8.62	9.94	3.16	2	0.62	1.23	99.54	58.9103		6.7082	2.00414	25.3077	17776.2	274.84	231.508	1373.52	45.208	166.47	54.0246	88.6737	20.6509	48.0616	803.32	29.7016	217.43	65.4935	2.18114	1.82282	0.516021	754.97	40.8662	82.8677	9.46779	38.2421	7.90508	2.46948	6.93063	0.992915	5.7229	1.03458
	JG-6SR
Fangcheng
	SFC05	124.9	124.9	Liu et al 2008	47.8	1.1	12.8	9.08	0.13	11.7	9.15	3.15	1.15	0.8	2.97	99.9	71.8506		11.8955	1.46196	21.0784	6472.73	162.207	580.995	1039.8	39.9753	252.216	20.7618	96.3396	17.9296	15.6438	1334.41	26.8828	255.065	14.5637	0.429331	0.83507	3.16328	1411.84	126.54	246.596	27.7374	103.275	15.5865	3.77068	9.29555	1.10979	5.23971	0.875879
	SFC06	124.9	124.9	Liu et al 2008	48	1.1	13.1	9	0.13	11.2	8.7	2.99	1.36	0.83	3.16	99.7	71.141		11.9316	1.57553	21.3642	6556.44	166.5	552.95	1063.29	39.9969	245.459	20.4494	98.3957	19.597	17.4302	1401.69	28.0585	267.522	15.3251	0.554589	0.842563	2.47502	1436.59	126.641	249.719	28.128	105.316	15.5584	3.80411	9.51085	1.12343	5.37538	0.899994
	SFC06R
	SFC09	124.9	124.9	Liu et al 2008	48.1	1.09	13.2	9.01	0.13	11	9.16	3.17	1.22	0.83	3.09	99.9	70.7466		12.4647	1.69678	21.179	6399.63	159.661	593.184	1057.89	41.3609	271.491	21.469	96.646	18.0743	15.5856	1364.39	27.0584	251.875	14.5268	0.429136	0.823727	3.00428	1403.11	124.747	243.859	27.5281	102.016	15.214	3.7011	9.24337	1.11224	5.28684	0.858253
	SFC09R	124.9	124.9
	SFC14	124.9	124.9	Liu et al 2008	47.3	1.14	12.8	8.93	0.13	11.5	9.01	3.19	1.03	0.78	3.82	99.6	71.8388		11.157	1.55453	20.9184	6833.34	164.981	533.853	1035.61	40.3047	248.411	27.7626	94.488	18.0127	18.1743	1506.82	26.3969	260.224	14.5448	0.355267	0.869141	0.886588	1576	122.27	248.517	27.3849	101.108	15.0249	3.71258	9.34889	1.12847	5.36326	0.89683
	SFC14R
	SFC17	124.9	124.9	Liu et al 2008	48	1.08	12.4	9.01	0.13	12	9.3	3.69	1.14	0.78	2.52	99.9	72.5144		11.2975	1.75206	19.7531	6543.2	155.536	467.488	1049.7	37.7029	192.627	22.6493	100.373	18.6957	22.3645	1545.59	28.5723	279.807	15.9646	0.552141	0.883148	1.19577	1463.04	129.868	255.206	28.7296	106.824	16.1229	3.84147	9.60003	1.16773	5.45285	0.938928
	SFC17R
	SFC31	124.9	124.9	Liu et al 2008	48	1.11	13.1	9.03	0.13	11.3	8.98	3.23	1.23	0.83	3.03	100	71.255		12.7098	1.68988	21.2316	6509.42	162.057	560.244	1054.42	40.5262	251.118	21.0603	98.5457	18.481	16.1186	1372.35	26.8351	258.646	15.1795	0.447296	0.846149	2.52308	1443.9	127.704	249.846	27.9009	102.411	15.3333	3.74762	9.69752	1.11344	5.3975	0.903559
Feixian
	SFX02	119	119	Liu et al 2008	48.8	1.09	12.1	8.94	0.12	12.7	8.82	2.37	2.29	0.68	1.52	99.4	73.781		30.6847	1.55658	20.4803	6634.06	157.218	627.533	1000.31	45.0636	438.13	37.437	95.3261	17.1809	39.0553	1575.7	27.7794	234.233	12.4284	1.24554	0.832762	15.9156	2180.61	110.561	215.533	24.5339	94.1873	15.6482	3.84696	9.55197	1.12968	5.19991	0.862361
	SFX02R
	SFX02R
	SFX27	119	119	Liu et al 2008	49.2	1.07	11.9	8.75	0.12	13	8.74	2.18	2.72	0.64	0.94	99.3	74.6389		28.2957	1.52456	19.9108	6324.46	152.621	657.199	972.944	45.4351	460.263	42.7731	93.0679	16.9732	48.1343	1530.11	25.7478	221.112	12.1831	1.20672	0.845239	7.01771	2099.55	108.42	206.487	23.1998	88.5625	14.7752	3.68361	9.57853	1.11896	5.13408	0.834176
	SFX27R
	SFX27R
	SFX27R
	SFX-49	119	119	Liu et al 2008	48.5	1.13	11.7	8.95	0.12	13.6	8.87	2.05	2.24	0.68	2.09	99.8	75.0628		36.3167	1.56655	20.8469	6697.66	156.725	694.456	1009.85	47.6549	486.619	42.1371	96.2357	17.0319	47.452	1567.8	26.8998	232.587	12.7714	1.28643	0.856451	9.18232	2207.64	115.588	221.339	25.3889	96.9461	15.7729	3.98	10.0353	1.15552	5.45213	0.896754
	SFX-49R
Sihetun
	SHT-15	124-125	124	Gao et al 2008	50.025	0.85	13.075	8.485	0.12	10.405	7.91	2.65	2.565	0.805	2.67	99.56	70.8382				26.0502		182.627	838.077		85.7791	205.344				63	935	23	166.069	8.97323			2.7414	2099.04	62.2194	132.691	16.5318	69.7956	13.2428	3.53422	11.0885	1.25706	5.45463	0.852844
	SHT-15R
	SHT-17	124-125	124	Gao et al 2008	49.83	0.86	13.21	8.44	0.11	10.4	7.85	2.56	2.44	0.81	3.03	99.54	70.938				26.5863		187.565	843.057		52.3445	192.315				59	765	23	152.462	8.97209			2.84862	1759.66	62.0262	131.714	16.393	69.7549	13.201	3.44993	11.0471	1.24072	5.38334	0.849242
	SHT-19	124-125	124	Liu et al 2008	49.81	0.84	12.99	8.53	0.11	11.03	7.83	2.52	2.44	0.8	2.68	99.58	72.1151		61.0143	2.4289	27.0233		184.974	902.944		55.2449	226.433	60.9243	75.7174	17.2683	62.1535	821.021	25.3143	154.285	8.99044			2.84746	1736.27	60.85	128.168	16.2564	68.2154	13.1056	3.39199	10.7587	1.2372	5.3248	0.837453
	SHT-19R
	SHT-20	124-125	124	This study	49.75	0.82	12.77	8.65	0.12	10.92	7.97	2.6	2.42	0.78	2.7	99.5	71.4346		34.5483	1.8457	24.7499	4970.13	178.26	942.203	944.646	43.5969	252.447	54.9762	77.8556	16.2784	56.7613	839.816	23.9012	141.27	8.22168	0.312415	1.27883	2.62039	1648.4	59.228	133.366	15.7906	64.2813	12.6763	3.3237	8.94446	1.11949	5.01819	0.822782
	SHT-21	124-125	124	Liu et al 2008	49.41	0.84	12.67	8.48	0.12	11.05	8.08	2.48	2.35	0.77	3.25	99.5	72.2695		52.2133	2.11355	30.6429		197.447	1105.57		46.8065	274.687	67.6933	78.9324	16.4344	61.5229	801.888	26.0813	167.753	8.74885			2.82127	1742.06	59.821	130.589	15.8145	68.1977	13.2421	3.41042	10.9232	1.25529	5.55183	0.858611
	SHT-25	124-125	124	Gao et al 2008	49.505	0.845	12.73	8.525	0.11	10.205	8.19	2.565	2.395	0.78	3.85	99.7	70.3376				28.3313		189.098	919.699		48.1406	211.184				58	809	22	175.527	9.26368			3.51947	1740.92	59.5132	126.558	15.8819	67.0349	12.9393	3.37893	10.5633	1.22577	5.31544	0.840685
	SHT-28	124-125	124	Liu et al 2008	50.2	0.83	12.8	8.53	0.11	10.9	8.14	2.58	2.39	0.77	2.33	99.5	71.6816		36.0685	1.83552	25.3787	5012.04	178.996	939.093	930.633	42.6451	240.139	62.6046	78.3264	16.3132	58.1358	849.379	24.2575	144.546	8.53313			2.59985	1677.62	60.3523	132.75	15.921	64.8912	12.9076	3.2999	9.34304	1.11629	5.10123	0.828264
	SHT-28R																		35.1039	2.00203	24.9204	5031.72	178.284	919.212	938.755	42.8894	241.898	69.0687	76.8844	16.3538	58.3966	836.874	24.0622	153.356	8.52735			2.61257	1690.39	59.6548	133.783	15.9408	65.203	13.1262	3.30166	9.01488	1.1174	5.24478	0.822368
	SHT-37	124-125	124	Gao et al 2008	50.08	0.86	13.11	8.47	0.11	10.45	8.04	2.64	2.49	0.81	2.5	99.56	70.9637				27.4038		190.691	879.251		50.8827	210.944				61	822	23	171.36	9.32205			2.91876	1800.16	60.6888	130.111	16.2965	68.4473	13.189	3.42569	10.7245	1.2271	5.37009	0.848251
Shanwang
	X15SW05	17-18	17	This study	42.33	2.74	12.88	12.67	0.18	11.73	9.49	3.67	0.71	0.7	2.55	99.65	64.7134		6.33019	2.32607	22.4153	16362.6	254.04	281.993	1429.75	58.0175	267.144	60.4309	94.0356	21.1464	14.2875	813.398	24.1067	225.752	67.1845	3.20597	1.94341	0.445944	437.068	41.778	85.473	9.5535	36.6189	7.40726	2.4013	6.58532	0.937123	5.00229	0.866621
	X15SW21	17-18	17	This study	42.34	2.74	12.87	12.71	0.18	11.75	9.72	3.19	0.92	0.62	2.89	99.93	64.6803		6.93501	2.35412	22.484	16315.9	251.846	310.697	1405.35	60.6201	291.503	57.9644	94.3674	21.7826	26.3752	896.692	22.8168	240.229	59.4054	1.97188	1.82672	0.333953	361.385	37.2159	74.8966	8.55488	33.5126	7.08301	2.2888	6.05254	0.914629	4.72472	0.819296
	X15SW45	17-18	17	This study	42.32	2.72	13.15	12.46	0.17	11.69	9.33	3.55	1.02	0.65	2.86	99.92	65.0164		6.59008	2.49666	21.5353	15962.3	243.382	298.408	1325.51	57.8172	277.712	56.6061	92.2176	21.6001	15.6916	781.014	22.6742	236.993	61.7249	2.48692	1.92595	0.292127	363.909	38.0161	76.3687	8.85305	33.9776	7.04824	2.26411	6.1141	0.878011	4.82873	0.798958
	X15SW46	17-18	17	This study	42.4	2.76	13.24	12.46	0.17	11.7	9.35	3.54	0.99	0.65	2.89	100.15	65.0359		6.72815	2.56194	22.3606	16507.9	252.712	308.289	1365.18	58.5945	281.172	59.3451	94.8213	22.0691	13.2117	796.829	23.8234	248.412	63.9262	2.48752	1.92099	0.283261	373.866	38.8684	77.8853	8.90209	34.7539	7.30899	2.3698	6.34039	0.897027	4.87641	0.827249
	X15SW58	17-18	17	This study	41.85	2.68	12.65	12.8	0.18	12.87	9.31	3.11	0.58	0.64	3.09	99.76	66.5745		6.09769	2.00765	22.0718	15911.8	250.21	361.035	1452.22	61.4266	346.473	57.4129	92.5655	20.4587	17.0861	768.639	22.7687	212.852	63.6986	2.88905	1.73954	0.548255	405.697	37.5371	76.9536	8.52817	33.5291	7.02336	2.22739	5.91799	0.896602	4.69157	0.795583
	X15SW58R																		6.0311	2.17587	22.1549	15751.4	241.866	351.759	1443.86	59.8746	334.302	56.8762	93.5336	20.3801	16.6934	756.053	21.9237	205.702	62.2294	2.84862	1.82846	0.553476	401.64	37.4862	72.6636	8.40376	33.3369	6.67701	2.1769	5.94014	0.876975	4.6746	0.797636
	X15SW60-1	17-18	17	This study	41.84	2.65	12.42	12.84	0.19	13.17	9.22	3.12	0.59	0.62	2.87	99.53	67.0164		6.19229	2.0705	21.7498	15713.7	245.419	356.434	1424.36	62.3403	354.549	57.0495	91.8373	20.2318	17.3157	745.476	22.4605	206.552	61.572	2.66767	1.71817	0.528222	397.765	36.9037	72.6291	8.357	32.2125	6.83008	2.16377	6.05347	0.860089	4.66975	0.774278
Yixian
	YX-101	122-125	125	This study	48.82	0.7	12.19	9.56	0.14	14.08	7.25	3.04	1.28	0.64	1.92	99.62	74.4733		39.4143	1.26721	26.6574	4109.03	195.617	1473.52	1131.93	53.1676	383.196	70.7099	77.0888	15.9048	25.4558	607.716	13.9628	88.1181	6.17852	0.193018	1.03552	2.8122	533.494	16.045	35.4705	4.47231	17.7484	3.60932	1.00503	2.89982	0.436587	2.4775	0.486653
	YX-102	122-125	125	This study	48.99	0.68	12.19	9.59	0.15	14.22	7.43	3.17	1.25	0.65	1.36	99.68	74.6017		31.8546	1.1736	26.9894	4132.54	195.769	1511.76	1134.11	52.4931	381.3	72.1383	76.6551	15.7177	24.0671	627.538	14.2717	87.1854	6.05435	0.421019	1.11872	1.7504	511.994	15.9754	35.0352	4.44329	18.096	3.53249	1.03194	2.94687	0.443929	2.48269	0.46074
	YX-102R	122-125			49.01	0.68	12.26	9.62	0.15	14.22	7.44	3.13	1.25	0.65	1.34	99.75	74.5424
	YX-104		125	This study	49.52	0.7	12.37	9.49	0.15	14.07	7.44	3.19	1.3	0.67	1.25	100.15	74.5993		41.4197	1.27061	26.6927		176.525	1173.11		57.3262	349.296	67.7221	69.6942	15.1833	25	623	12	103.456	6.31737			2.31013	564.248	16.5011	36.4951	4.89167	19.2784	3.63676	1.07556	3.40043	0.461322	2.45547	0.499477
	YX-108	122-125	125	Liu et al 2008	49.34	0.7	12.37	9.41	0.15	13.96	7.3	2.99	1.29	0.67	2.08	100.26	74.611		41.7064	1.4236	28.79		237.505	1200.47		57.0804	356.613	65.4606	70.8237	15.5136	29.1476	626.71	14.0344	103.369	6.45197			3.51404	578.069	16.8653	37.0517	4.7807	19.5232	3.57395	1.04497	3.26371	0.446666	2.47491	0.48173
	YX-110		125	Geng et al 2019	49.61	0.7	12.43	9.49	0.15	13.98	7.48	3.18	1.29	0.67	1.25	100.23	74.4776		38.5971	1.33616	26.6595		179.732	1127.11		57.857	350.653	69.76	69.7638	15.3431	24	598	11	100.539	6.27746			1.71555	566.201	16.4981	36.4017	4.86373	19.4902	3.67843	1.07719	3.37796	0.464657	2.4583	0.499811
	YX-114		125	Geng et al 2019	49.44	0.69	12.19	9.38	0.15	14.36	7.11	3.05	1.3	0.67	1.79	100.13	75.202		40.33	1.28252	27.8839		243.906	1250.84		59.7821	371.966	67.9449	72.1613	15.5282	25	596	11	102.342	6.36419			2.31398	587.231	17.221	37.9749	4.87149	19.4272	3.63428	1.07134	3.31046	0.441824	2.41058	0.47299
	YX-115		125	Geng et al 2019	50.3	0.74	12.64	9.09	0.14	12.89	7.21	3.32	1.47	0.68	1.64	100.12	73.7464		36.2182	1.47925	26.4893		229.075	946.958		53.1884	283.13	65.4151	69.3029	15.932	26	679	12	110.922	7.15234			2.31804	694.513	19.124	41.5712	5.25923	21.2836	3.90476	1.13016	3.45193	0.4583	2.42859	0.475136
	YX-25	122-125	125	Liu et al 2008	49.26	0.71	12.51	9.59	0.14	14.07	7.57	2.99	1.27	0.68	1.57	100.36	74.4002		32.8524	1.16692	27.0773	4132.39	196.575	1464.23	1132.91	52.6333	380.133	77.0817	77.2185	15.8248	24.8746	626.666	14.2195	89.3511	6.23182	0.226428	1.06517	2.38589	515.597	16.0725	35.9641	4.49382	17.9282	3.43304	1.0093	2.9096	0.434732	2.47425	0.464631
	YX-26	122-125	125	Liu et al 2008	48.93	0.69	12.35	9.56	0.14	14.39	7.44	2.89	1.22	0.66	1.84	100.11	74.8851		45.162	1.18903	23.6064		193.358	1410.94			354.934	67.803	77.8185	14.5778	26.5622	606.897	12.4412	93.2937	6.23507			3.06937	524.69	16.705	36.0422	4.56666	18.6662	3.67947	1.00133	3.29439	0.438048	2.41001	0.509132
	YX-27	122-125	125	Liu et al 2008	49.25	0.71	12.46	9.51	0.14	13.86	7.46	2.98	1.26	0.67	1.76	100.06	74.2731		37.5966	1.24911	28.8171		194.562	1368.28			335.564	66.9707	75.7083	14.5053	27.7944	605.471	12.6535	95.4847	6.50127			2.67443	545.127	16.9356	36.4278	4.62526	18.6455	3.70458	1.00751	3.27495	0.437903	2.4168	0.508675
	YX-28	122-125	125	This study	48.3	0.69	12.06	9.5	0.15	14.08	7.43	3.14	1.24	0.64	2.43	99.66	74.5928		29.5096	1.24611	25.6504	4120.56	207.312	1496.4	1153.77	53.8172	393.345	75.9262	77.6876	15.8426	24.2229	643.507	13.9111	89.395	6.14235	0.313009	1.05079	1.90296	565.561	16.1046	35.8505	4.50952	18.0504	3.40868	1.03614	2.9405	0.440877	2.3975	0.474103
	YX-29	122-125	125	This study	49.53	0.74	12.77	9.17	0.13	12.25	7.47	3.45	1.48	0.67	1.92	99.58	72.5745		32.0135	1.25995	26.0374	4335.01	197.145	930.841	1086.28	45.2402	260.494	69.7844	74.4618	16.447	27.3999	713.165	14.2864	98.475	6.90778	0.40447	1.14387	2.2463	630.92	19.0608	41.6979	5.13926	20.4926	3.78214	1.13232	3.16175	0.465803	2.59204	0.497998
	YX-32	122-125	125	This study	48.91	0.67	12.2	9.6	0.15	14.28	7.44	3.18	1.26	0.65	1.26	99.6	74.6616		31.1642	1.1874	25.7882	4047.11	197.139	1545.56	1144.25	53.1124	398.346	67.19	76.6556	15.9259	24.3078	613.668	14.2856	87.9434	5.95643	0.333115	1.14161	1.70332	513.714	16.0253	35.5584	4.40239	17.9937	3.53192	0.982316	2.81691	0.437489	2.41375	0.465234
	YX-32R																		31.3133	1.23897	26.5883	4010.83	192.132	1498.96	1146.08	53.0039	398.206	69.8716	77.7478	15.6752	23.7118	617.851	14.1746	87.542	6.01848	0.359318	1.07979	1.62552	509.574	15.9926	35.3589	4.44266	18.031	3.38622	1.0025	2.84716	0.424292	2.44494	0.481057
R: Replicate digestion of the same sample powder to evaluate sample heterogeneity.
SR: Re-analyses of different aqua regia solution from the same sample digestion for data quality evaluation of gold and PGEs.
Major elements are from this study, except those labled Liu et al. 2008, Gao et al. 2008 and Geng et al. 2019. Trace elements are from this study, except four samples (with double underline) SHT15, SHT17, SHT25 and SHT37 which are from Gao et al 2008; eight samples with single underline which are from Geng et al 2019.
Many basalts that were measured for gold and PGE in this study have published Os-Sr-Hf-Hf-Pb isotopic compositions. See more isotopic data for basalts from the same locations in the relevant literature below.
Literature:
Gao, S., Rudnick, R.L., Xu, W.-L., Yuan, H.-L., Liu, Y.-S., Walker, R.J., Puchtel, I.S., Liu, X., Huang, H., Wang, X.-R., Yang, J., 2008. Recycling deep cratonic lithosphere and generation of intraplate magmatism in the North China Craton. Earth Planet. Sci. Lett. 270, 41-53.
Liu, Y., Gao, S., Kelemen, P.B., Xu, W., 2008. Recycled crust controls contrasting source compositions of Mesozoic and Cenozoic basalts in the North China Craton. Geochim. Cosmochim. Acta 72, 2349-2376.
Zhu YS，Hou GS and Yang JH. 2012. Sources and petrogenesis of the Cenozoic alkali basalts in Hebi，eastern North China Craton: Geochemical and Sr-Nd-Hf isotopic evidence. Acta Petrologica Sinica，28( 12) : 4064 － 4076.
Meng, F., Gao, S., Niu, Y., Liu, Y., Wang, X., 2015. Mesozoic–Cenozoic mantle evolution beneath the North China Craton: A new perspective from Hf–Nd isotopes of basalts. Gondwana Res. 27, 1574-1585.
Huang, F., Xu, J.-F., Liu, Y.-S., Li, J., Chen, J.-L., Li, X.-Y., 2017. Re–Os isotope evidence from Mesozoic and Cenozoic basalts for secular evolution of the mantle beneath the North China Craton. Contrib. Mineral. Petrol. 172, 28.
Geng, X., Liu, Y., Wang, X.-C., Hu, Z., Zhou, L. and Gao, S. (2019) The Role of Earth's Deep Volatile Cycling in the Generation of Intracontinental High-Mg Andesites: Implication for Lithospheric Thinning Beneath the North China Craton. Journal of Geophysical Research: Solid Earth 124, http://doi:10.1029/2018JB016157.
Geng, X., Foley, S.F., Liu, Y., Wang, Z., Hu, Z. and Zhou, L. (2019) Thermal-chemical conditions of the North China Mesozoic lithospheric mantle and implication for the lithospheric thinning of cratons. Earth Planet. Sci. Lett. 516, 1-11.
Zhang, H.-F., Sun, M., Zhou, X.-H., Fan, W.-M., Zhai, M.-G. and Yin, J.-F. (2002) Mesozoic lithosphere destruction beneath the North China Craton: evidence from major-, trace-element and Sr–Nd–Pb isotope studies of Fangcheng basalts. Contrib. Mineral. Petrol. 144, 241-254.
Zhi, X., Chen, D., Zhang, Z., and Wang, J., 1994, The neodymium and strontium isotopic compositions of Cenozoic Alkalic Basalts from Penglai and Lingqu, Shandong Province: Geological Review, v. 40, no. 6, p. 526–533. [In Chinese.]
[truncated: 67 more columns]

## Sheet: Table DR3 literature data
Table DR3: Compiled literature data on mantle peridotite xenoliths from North China Craton.
Reference*	Locality	Sample type	Analytical technique	Lithology	Lithology comment	Sample ID	SiO2	Al2O3	FeO	MnO	MgO	CaO	Na2O	K2O	TiO2	P2O5	LOI	H2O-	H2O+	Mg#	Li	Be	C	F	S	Cl	Sc	V	Cr	Co	Ni	Cu	Zn	Ga	Ge	As	Se	Br	Rb	Sr	Y	Zr	Nb	Ru	Rh	Pd	Ag	Te	Cs
Chu et al, 1999 patterns of PGE	Hannuoba	Xenoliths	NAA	lherzolite	sp	DA-5																																						5.31	0.95	2.5
Chu et al, 1999 patterns of PGE	Hannuoba	Xenoliths	NAA	lherzolite	sp	D11																																						4.15	0.84	1.7
Chu et al, 1999 patterns of PGE	Hannuoba	Xenoliths	NAA	Harzburgite	sp	D12																																						1.67	0.29	0.7
Chu et al, 1999 patterns of PGE	Hannuoba	Xenoliths	NAA	Granulites	opx cpx pl	D08																																						0.2	0.14	0.56
Chu et al, 1999 patterns of PGE	Hannuoba	Xenoliths	NAA	Granulites	opx cpx pl	D13																																						0.2	0.15	0.6
Chu et al, 1999 patterns of PGE	Hannuoba	alkali basalt	NAA	Basalt		D09																																						0.31	0.17	0.65
Chu et al, 1999 patterns of PGE	Hannuoba	alkali basalt	NAA	Basalt		J06																																						0.3	0.17	0.6
Fischer-Godde et al. 2011	Hannouba	Xenoliths	ICP-MS	Lh-Dup		DMP19_Dup		1.91																	91																			8.77	1.29	6.9
Fischer-Godde et al. 2011	Hannouba	Xenoliths	ICP-MS	Lh-Dup		DMP41_Dup		2.76																	110																			5.97	1.08	4.35
Fischer-Godde et al. 2011	Hannouba	Xenoliths	ICP-MS	Lh-Dup		DMP56_Dup		3.49																	260																			6.33	1.03	5.68
Fischer-Godde et al. 2011	Hannouba	Xenoliths	ICP-MS	Lh-Dup		DMP60_Dup		3.67																	320																			7.01	1.22	6.11
Fischer-Godde et al. 2011; Rudnick et al. 2004	Hannouba	Xenoliths	ICP-MS	Lh		DMP04	44.4	2.29	7.33	0.13	42.05	1.94	0.28	0.015	0.06	0.01				0.911	1.64	0.018	272		73		12.7	51	2477	106	2322	17	37	2.1	0.9				0.28	4.38	1.46		0.18	7.15	1.34	5.29			0.008
Fischer-Godde et al. 2011; Rudnick et al. 2004	Hannouba	Xenoliths	ICP-MS	Lh		DMP19	44.83	1.91	7.07	0.12	40.74	1.8	0.19	0.025	0.03	0.01				0.911	2.34	0.059	1729		91		10.1	39	2238	108	2454	10	33	2.97	0.91				0.81	17.9	0.73		0.73	8.56	1.17	6.78			0.011
Fischer-Godde et al. 2011; Rudnick et al. 2004	Hannouba	Xenoliths	ICP-MS	Lh		DMP41	44.75	2.76	7.74	0.13	40.15	2.12	0.27	0.004	0.06	0.11				0.902	1.55	0.028	283		110		12.9	59	2654	105	2224	15	40	8.44	0.9				0.15	6.27	1.93	2.84	0.26	5.86	1.08	4.32			0.003
Fischer-Godde et al. 2011; Rudnick et al. 2004	Hannouba	Xenoliths	ICP-MS	Peridotite		DMP51	44.83	1.96	7.41	0.12	41.97	1.89	0.24	0.006	0.05	0.003				0.91	1.85	0.03	264		130		11.9	49	2619	107	2403	14.7	36	1.91	0.94				0.73	4.23	1.3	2.27	0.18	6.5	1.03	4.07			0.026
Fischer-Godde et al. 2011; Rudnick et al. 2004	Hannouba	Xenoliths	ICP-MS	Lh		DMP56	44.79	3.49	7.97	0.14	38.15	3.21	0.36	0.007	0.13	0.006				0.895	2.23	0.043	280		260		16.2	74	2318	103	2006	27.3	42	3.73	1.03				0.35	9.83	3.7	6.72	0.49	6.28	1.14	5.74			0.009
Fischer-Godde et al. 2011; Rudnick et al. 2004	Hannouba	Xenoliths	ICP-MS	Lh		DMP58	44.87	3.16	7.92	0.13	38.82	2.76	0.34	0.012	0.08	0.005				0.897	2.13	0.027	184		230		14.9	65	2224	103	2190	20.5	38	3.14	0.98				0.46	4.57	2.7	2.57	0.35	7.08	1.29	5.9			0.013
Fischer-Godde et al. 2011; Rudnick et al. 2004	Hannouba	Xenoliths	ICP-MS	Peridotite		DMP59	43.99	2.58	7.99	0.13	40.38	2.43	0.27	0.007	0.06	0.019				0.9	2.09	0.049	294		200		12.8	55	2628	110	2366	20.8	42	2.39	0.96				0.44	8.31	1.9	3.2	0.53	7.98	1.43	6.6			0.02
Fischer-Godde et al. 2011; Rudnick et al. 2004	Hannouba	Xenoliths	ICP-MS	Lh		DMP60	46.34	3.67	7.48	0.13	36.68	3.47	0.38	0.006	0.11	0.009				0.897	2.2	0.021	245		320		17.2	75	2530	97	1949	22.4	39	3.13	1.08				0.26	15	3.7	5.14	0.22	6.79	1.19	6			0.005
Orberger et al. 1998	Kuandan	Xenoliths	RNAA	Lh		J36C3																										NA												4.77		1.7
Orberger et al. 1998	Hannouba	Xenoliths	RNAA	Lh		X-14																										NA												7.55		6.41
Orberger et al. 1998	Huinan	Xenoliths	RNAA	Lh		A-18																										NA												8.29		4.38
Orberger et al. 1998	Huinan	Xenoliths	RNAA	Lh		A-25																										NA												4.26		2.51
Orberger et al. 1998	Huinan	Xenoliths	RNAA	Lh		A-26																										NA												6.87		2.56
Orberger et al. 1998	Huinan	Xenoliths	RNAA	Lh		A-27																										NA												6.82		2.51
Orberger et al. 1998	Qilin	Xenoliths	RNAA	Px		GPQ-1																										14												6.51		3.03
Orberger et al. 1998	Qilin	Xenoliths	RNAA	Px		GPQ-2																										12.2												8.92		5.26
Orberger et al. 1998; Tatsumoto et al. 1992	Hannouba	Xenoliths	RNAA	Lh		X-23																										NA							0.0982	4.78				6.98		3.64
Orberger et al. 1998; Tatsumoto et al. 1992	Hannouba	Xenoliths	RNAA	Px		X-11																										NA							0.411	13.8				7.67		1.15
Orberger et al. 1998; Xu et al. 1998	Wangqing	Xenoliths	RNAA	Lh	Protogranular	WQ91-1	44.63	3.34	7.66	0.12	39.81	2.7	0.52	0.01	0.1					0.903							13.8	67.5	2716		2077	20.3	52						0.313	7.74	2.87	5.2	0.092	4.06		2.92
Orberger et al. 1998; Xu et al. 1998	Wangqing	Xenoliths	RNAA	Lh	Protogranular	WQ91-37	45.07	4.06	7.35	0.12	37.75	3.68	0.73	0.03	0.15					0.902							17.8	87	2913		1898	25.3	53.1						0.475	14.02	4.43	7.13	0.243	6.67		3.61
Orberger et al. 1998; Xu et al. 1998	Wangqing	Xenoliths	RNAA	Lh	Porphyroblastic	WQ91-6	44.95	3.86	8.32	0.13	37.93	3.37	0.27	0.02	0.14					0.891							16	83.8	2591		1948	18.5	53						0.587	16.59	4.15	6.64	0.214	5.85		2.37
Orberger et al. 1998; Xu et al. 1998	Wangqing	Xenoliths	RNAA	Lh	Porphyroblastic	WQ91-11	45.05	2.58	7.53	0.11	41.34	2.15	0.06	0	0.03					0.908							12.9	54.6	3110		2184	7.8	52.6						0.399	4.47	1.56	1.06	0.106	5.21		0.82
Orberger et al. 1998; Xu et al. 1998	Wangqing	Xenoliths	RNAA	Lh	Porphyroblastic	WQ91-77	44.37	3.18	8.22	0.12	39.65	2.72	0.15	0.02	0.09					0.896							14.5	68.8	2681		2139	18.7	53.9						0.443	8.64	2.95	3.6	0.14	6.36		3.71
Orberger et al. 1998; Xu et al. 1998	Wangqing	Xenoliths	RNAA	Hz	Granoblastic	WQ91-5	43.09	0.66	7.98	0.12	46.24	0.66	0.06	0	0.01					0.912							7.1	31	2869		2539	11.3	58						0.37	15.8	0.16	1.41	0.374	6.57		2.46
Orberger et al. 1998; Xu et al. 1998	Wangqing	Xenoliths	RNAA	Hz	Granoblastic	WQ91-13	43.88	0.86	7.76	0.12	45.03	0.83	0	0.03	0.02					0.912							8.6	34.8	2557		2468	3.5	49.7						0.674	7.42	0.38	2.95	0.582	0.86		1.66
Orberger et al. 1998; Xu et al. 1998	Wangqing	Xenoliths	RNAA	Lh	Granoblastic	WQ91-20	43.75	1.65	7.94	0.12	44.43	1.39	0.13	0.03	0.05					0.909							8.9	39.4	2519		2413	9.1	54.2						0.745	8.04	1.09	2.15	0.212	7.81		2.56
Orberger et al. 1998; Xu et al. 1998	Wangqing	Xenoliths	RNAA	Lh	Granoblastic	WQ91-21	44.15	1.98	7.93	0.12	42.34	2.09	0.11	0	0.04					0.906							12.5	57.4	2975		2290	13.6	52.9						0.246	3.6	1.11	0.78	0.103	8.05		<2.30
Orberger et al. 1998; Xu et al. 1998	Wangqing	Xenoliths	RNAA	Hz	Granoblastic	WQ91-22	43.36	1.13	8.16	0.12	45.5	0.65	0.06	0.03	0.08					0.909							6	30.3	2562		2567	2.9	54.3						0.648	11.36	1.03	4.32	0.82	7.97		<2.10
Zhang 2008CMP	Mengying	xenoliths		GtLh	Fresh granular garnet lherzolite	DHS	44.2	2.66	8.14	0.12	40.9	2.82	0.12	0.05	0.13					90.9																			2.49	21.5	1.55	2.17	1.33	4.86	1.36	9.18
Zhang 2008CMP	Mengying	xenoliths		SpLh	Fresh spinel porphyroclastic lherzolite	NY-G1	44.8	3.63	9.26	0.13	37.3	4.03	0.21		0.14					88.9	8.32	0.08					18.6												0.62	22.4	3.63	6.69	0.37	5.8	1.69	6.75			0.17
Zhang 2008CMP	Mengying	xenoliths		SpLh	Fresh spinel porphyroclastic lherzolite	NY-G2	46.9	3.55	9.34	0.12	35.1	3.45	0.27		0.13					88.1	15.1	0.12					16.9												1.06	26.3	3.86	14.4	1.57	7.26	1.79	8.65			1.64
Zhang 2008CMP	Mengying	xenoliths		SpLh	Fresh spinel porphyroclastic lherzolite	NY-G3	45.8	3.24	9.53	0.13	36.6	3.59	0.25		0.11					88.4	7.15	0.1					15.7												0.88	20.2	3	5.68	0.43	4.88	1.13	6.62			0.89
Zhang 2008CMP	Mengying	xenoliths		SpLh	Fresh spinel porphyroclastic lherzolite	NY-G4	45.4	3.09	9.66	0.13	36.9	3.8	0.22		0.12					88.3	6.04	0.11					15.6												0.76	18.9	3.23	7.47	0.58	6.7	1.28	8.32			0.92
Zhang 2008CMP	Mengying	xenoliths		SpLh	Kelyphite pyrope-bearing serpentinized peridotite with few fresh olivine relicts, pyrope can be as high as 5% and up to 7 mm.	L50-2003	53.3	2.21	6.03	0.05	29.2	0.93	0.09		0.09		7.16			90.6	36.47	1.04					4.3												3.15	88	1.24	7.16	3.04	7.41	1.92	4.11			3.53
Zhang 2008CMP	Mengying	xenoliths		SpLh	Garnet-bearing serpentinized peridotite, fresh Cr-pyrope	LN-9830	42.7	1.5	5.43	0.17	21.3	10.5	0.07		0.05		17.5			88.6	59.9	1.27					28												1.6	172	5.9	9.74	5.54	7.58	2.1	2.86			2.16
Zhang 2008CMP	Mengying	xenoliths		SpPer sulfide	Highly serpentinized peridotite, rare sulphide and spinel	F50-9254	30.9	1.02	5.39	0.48	20.5	18.1	0.11		0.01		22.8			88.3																								5.7	0.89	2.93
Zhang 2008CMP	Mengying	xenoliths		Per sulfide	Highly serpentinized peridotite, rare sulphide, both spinel and garnet have not been found	F50-9270	28.7	0.69	5.3	0.47	22.2	16.3	0.08		0.02		25.6			89.2	21.2	1.53					46.6												1.9	142	5.2	5.51	1.43	6.19	0.86	2.72			2.66
Zhang 2008CMP	Mengying	xenoliths		Per sulfide	Highly serpentinized peridotite, rare sulphide, both spinel and garnet have not been found	F50-9274	43.8	0.67	7.7	0.07	22.4	6.96	0.26		0.12		17.8			85.2																								5.44	0.64	2.68
Zhang 2008CMP	Mengying	xenoliths		SpPer sulfide	Highly serpentinized peridotite, lots of sulphides and rare spinel	F50-9281	42.7	1.11	6.21	0.13	20.6	13.3	0.06		0.02		15.3			86.8																								16.6	2.59	4.3
Zhang 2008CMP	Mengying	xenoliths		Composite xenolith	Spinel lherzolite interlayered with garnet granulite composed of garnet, pyroxene and plagioclase	F50-9229	40.7	16.8	10.9	0.05	18.1	2.13	0.81	1.55	0.37		8.5			76.7	420	4.29					6.6												29	350	4.81	18.4	3.19	0.28	0.11	2.21			12.3
Zhang 2008CMP	Mengying	xenoliths		Olivine megacryst	Single serpentinized olivine megacryst from Pipe 42, Fuxian kimberlite field	L42-13																																						0.71	0.34	2.79
Zhang 2008CMP	Mengying	xenoliths		Chromite separate	Chromite separate from Pipe 50, Fuxian kimberlite field	F50-01																																						41.1	5.68	5.65
Zhang 2008CMP	Mengying	xenoliths		GtLh	Garnet-bearing serpentinized peridotite	SD-9804	39.6	0.67	7.05	0.06	38.1	0.44	0.07		0.27		13			91.5	51	1.41					3.6												3.94	32.3	1.61	20	13.9	3.66	0.56	4.01			0.91
Zhang 2008CMP	Mengying	xenoliths		GtLh	Garnet-bearing serpentinized lherzolite	SL-2001	39.1	0.7	8.65	0.05	36.7	0.54	0.04		0.05		13.3			89.4	86.7	0.56					3.7												2.3	52.7	1.78	12.6	9.99	5.97	0.71	3.25			0.88
Zhang 2008CMP	Mengying	xenoliths		GtLh	Garnet-bearing serpentinized lherzolite	Sv1b-11	38.1	1.84	7.95	0.08	36.4	0.61	0.04		0.11		13			90.1	35	0.95					4.1												5.9	86	1.71	23.1	17.7	8.68	1.97	4.7			0.81
Zhang 2008CMP	Mengying	xenoliths		SpPer	Spinel-bearing serpentinized peridotite	Sv1b-12	39.7	1.06	6.49	0.1	36.6	1.13	0.03		0.09		13.9			91.8	48.2	0.45					20.3												1.64	66.9	2.63	31.7	22.2	4.15	0.6	2.7			0.98
Zhang 2008CMP	Mengying	xenoliths		Px	Amphibole-bearing macrocrystic clinopyroxenite with grain sizes in a range of 0.5-1.5 cm, cpx is augitic composition	Sv1b-16	46.9	5.34	7.11	0.22	14.2	22.4	0.45	0.44	0.37		2.68			79.8	23.2	0.63					64.6												19	330	14.9	66.7	2.51						1.4
Zhang 2008CMP	Mengying	xenoliths		Px	Olivine clinopyroxenite	FC6-1-2	45.6	2.81	9.15	0.2	24.1	14.6	0.18	0.03	0.48		3.29			83.7							29												1.7	166	16.7	40	1.2
Zhang 2008CMP	Mengying	xenoliths		Px	Olivine clinopyroxenite	FC6-2-2	45.9	3.03	9.05	0.13	24.5	13.8	0.2	0.06	0.49		2.86			84.1							25												1.9	192	16.9	53	0.7
Zhang 2008CMP	Mengying	xenoliths		Px	Clinopyroxenite	FC25-2	52.6	2.11	6.56	0.14	20.2	16.7	0.16	0.05	0.29		1.4			85.8							28												0.7	180	13.8	27	0.3
Zheng et al. 2005	Xinyang; North China Craton	Xenoliths	ICP-MS	Hz	Spn	Y97-0	56.8	0.62	7.59	0.03	28.3	0.23	0.49	0.03	0.02	0.01	5.72			0.869212					35.6		4.55	24.5	1249		2585	7.15	40.4						0.38	5.6	1.35	1.17	0.09	7.47	0.55	3.71
Zheng et al. 2005	Xinyang; North China Craton	Xenoliths	ICP-MS	Hz	Spn	Y97-1	56.8	0.62	6.74	0.03	28.6	0.3	0.48	0.03	0.02	0.01	5.53			0.883225					40.8		3.37	18.5	768		2737	7.98	37.9						0.34	6.64	1.57	1.94	0.14	9.14	0.55	3.95
Zheng et al. 2005	Xinyang; North China Craton	Xenoliths	ICP-MS	Hz	Spn	Y97-2	56	0.84	8.73	0.03	27.4	0.25	0.52	0.03	0.03	0.01	6.01			0.848355					25.6		4.7	32.8	1594		2545	6.61	45.7						0.36	6.14	1.58	1.41	0.07	10.4	0.84	3.96
Zheng et al. 2005	Xinyang; North China Craton	Xenoliths	ICP-MS	Hz	Spn	Y97-4	56.5	0.4	7.17	0.03	28.4	0.12	0.46	0.02	0.01	0.01	5.93			0.875933					40.6		5.59	22.2	1386		2473	6.88	37.5						0.45	4.02	0.89	0.17	0.05	1.73	0.08	2.32
Zheng et al. 2005	Xinyang; North China Craton	Xenoliths	ICP-MS	Hz	Spn	Y97-5	56.6	0.62	8	0.03	28.1	0.19	0.49	0.02	0.02	0.01	5.8			0.862274					33.1		5.15	27.5	1490		2509	6.74	41.6						0.41	5.08	1.24	0.79	0.06	6.64	0.5	3.64
Zheng et al. 2005	Hebi; North China Craton	Xenoliths	ICP-MS	Hz	Spn	HB1	42.4	1.52	8.07	0.12	44.9	1.29	0.21	0.07	0.12	0.07	0.83			0.908401					82.8		4.67	27.6	2272		2266	8.8	53.6						4.07	77.2	1.13	19.6	9.22	12.6	0.8	7.16
Zheng et al. 2005	Hebi; North China Craton	Xenoliths	ICP-MS	Hz	Spn	HB2	43.2	1.94	7.42	0.11	44.4	1.03	0.29	0.08	0.11	0.06	0.66			0.914279					89.6		2.66	18.2	2186		2223	5.04	50						3.73	65.1	0.96	16.8	7.93	5.33	0.58	6.45
Zheng et al. 2005	Hebi; North China Craton	Xenoliths	ICP-MS	Hz	Spn	HB3	42.9	1.26	7.72	0.11	45.2	0.99	0.3	0.14	0.19	0.09	0.76			0.912557					101		3.73	22.3	2084		2245	5.86	54						6.1	106	1.58	33.2	15.5	10.5	0.34	5.28
Zheng et al. 2005	Hebi; North China Craton	Xenoliths	ICP-MS	Hz	Spn	HB4	42.4	1.38	7.7	0.11	46.1	0.89	0.14	0.05	0.08	0.04	0.91			0.914321					101		4.23	21.3	2345		2378	6.5	50.4						3.5	58.3	0.72	13.8	8.38	21.1	0.77	4.96
Zheng et al. 2005	Hebi; North China Craton	Xenoliths	ICP-MS	Hz	Spn	HB5	41.3	1.5	9.44	0.14	44	2.25	0.13	0.04	0.12	0.1	1			0.892565					39.6		8.04	48.7	2472		2219	17.8	60						2.95	79	1.27	14.6	5.13	13.7	1.5	12
Zheng et al. 2005	Shanwang; North China Craton	Xenoliths	ICP-MS	Lh	Spn	LQ1	43.3	4.4	9.61	0.14	34.8	5.04	0.22	0.09	0.35	0.36	1.58			0.865855					106		7	53.1	2480		1979	22.3	58.9						1.66	87.4	2.41	6.46	1.22	6.06	0.58	9.28
Zheng et al. 2005	Shanwang; North China Craton	Xenoliths	ICP-MS	Lh	Spn	LQ2	42.8	4.51	9.48	0.15	34.2	6	0.25	0.07	0.4	0.33	1.55			0.865416					102		6.85	56.5	2487		1992	23	59						1.84	108	2.02	4.71	0.97	13.7	0.67	6.51
Zheng et al. 2005	Shanwang; North China Craton	Xenoliths	ICP-MS	Lh	Spn	LQ13	43.4	4.34	9.73	0.13	34.4	4.81	0.21	0.13	0.34	0.47	1.53			0.863046					136		8.51	49.2	2511		1903	27.3	60.9						1.73	42.5	3.1	7.6	0.96	3.55	0.64	10.3
Zheng et al. 2005	Shanwang; North China Craton	Xenoliths	ICP-MS	Lh	Spn	LQ20	43.4	4.33	9.55	0.14	35.7	4.26	0.19	0.09	0.3	0.27	1.66			0.869505					78.6		7.09	53.5	2443		2042	16.6	56.8						1.4	112	2.1	7.07	1.74	0.3	3.85	5.77
Zheng et al. 2005	Shanwang; North China Craton	Xenoliths	ICP-MS	Lh	Spn	LQ21	43.4	4.34	9.65	0.14	35.1	4.54	0.21	0.1	0.32	0.37	1.6			0.866368					107		9.23	51.4	2477		1972	22	58.9						1.57	77.1	2.6	7.34	1.35	0.57	4.62	6.44
Data sources:
Orberger B, Xu Y, Reeves SJ. Platinum group elements in mantle xenoliths from eastern China. Tectonophysics 1998, 296(1–2): 87-101.
Chu X, Li X, Xu J, Liu J. Patterns of platinum-group elements in mantle peridotite, granulite xenoliths and basalt in Hannuoba. Chin Sci Bull 1999, 44(18): 1676-1681.
Zheng J, Sun M, Zhou M-F, Robinson P. Trace elemental and PGE geochemical constraints of Mesozoic and Cenozoic peridotitic xenoliths on lithospheric evolution of the North China Craton. Geochim Cosmochim Acta 2005, 69(13): 3401-3418.
Zhang H-F, Goldstein SL, Zhou X-H, Sun M, Zheng J-P, Cai Y. Evolution of subcontinental lithospheric mantle beneath eastern China: Re–Os isotopic evidence from mantle xenoliths in Paleozoic kimberlites and Mesozoic basalts. Contrib Mineral Petrol 2008, 155(3): 271-293.
Fischer-Gödde M, Becker H, Wombacher F. Rhodium, gold and other highly siderophile elements in orogenic peridotites and peridotite xenoliths. Chem Geol 2011, 280(3-4): 365-383.
[truncated: 35 more columns]
